# Supplementary material
Source: publisher figshare collection journal article supplement (https://springernature.figshare.com/ndownloader/files/17030237)
Supplement: Supplementary file 1 [file 17030237]

Additional File 1. For increasing deer density classes (low density class of <5.8 deer/km2, moderately low density class of 5.8–11.6 deer/km2, moderately high density class of 11.6-17.4 deer/km2, and high density class of 17.4 deer/km2) during 2001-2005, panels show percent of understocked forest, tree densities <2.54 cm, tree densities 2.54 to 12.7 cm, and tree densities 12.7 cm to 25.4 cm in the entire eastern United States followed by the northern, central, southern, and Prairie regions.
